# Supplementary material
Source: PubMed Central journal article supplement (PMC5730063)
Supplement: NIHMS924100-supplement-errata.pdf [file NIHMS924100-supplement-errata.pdf]

**Errata for:**

**Neumann MS, Finlayson TJ, Pitts NL, Keatley J. Comprehensive HIV prevention for transgender persons. *American Journal of Public Health* 2017;107:207-212. doi:10.2105/AJPH.2016.303509.**

The fourth sentence in the Introduction should read “These figures are higher than or comparable to 2011 HIV rates among black, white, and Hispanic men who had sex with men (36%, 15%, and 17%, respectively)<sup>2</sup> and blacks, whites, and Hispanics in general ( $\leq 1\%$  for each racial/ethnic group).<sup>3</sup>”
