# Supplementary material
Source: PubMed Central journal article supplement (PMC5730063)
Supplement: NIHMS924100-supplement-Table_A-supplemental.pdf [file NIHMS924100-supplement-Table_A-supplemental.pdf]

**TABLE A - Implementation Considerations When Selecting Evidence-Based Interventions Adaptable for Transgender Persons**

|                                                   | CLEAR <sup>33, a</sup>                                                                                           | Community PROMISE <sup>34, a</sup>                                                                                                                         | Connect <sup>35, a</sup>                                                                                          |
|---------------------------------------------------|------------------------------------------------------------------------------------------------------------------|------------------------------------------------------------------------------------------------------------------------------------------------------------|-------------------------------------------------------------------------------------------------------------------|
| Intervention level and original target population | Individual young substance users living with HIV                                                                 | Communities of IDUs, female sex partners of IDUs, sex workers, non-gay identified MSM, high risk youth                                                     | Heterosexual couples who have been together at least 6 months and not experiencing violence in their relationship |
| Effective in changing                             | Condom use, condomless sex, number of HIV-negative sex partners                                                  | Condom use                                                                                                                                                 | Condom use, condomless sex                                                                                        |
| Original setting                                  | Community agencies                                                                                               | Street outreach                                                                                                                                            | Primary health care facility                                                                                      |
| Sessions                                          | Eighteen, 2-hour sessions                                                                                        | Ongoing<br>Repeated brief encounters                                                                                                                       | One orientation session (each partner separately); Five, weekly 2-hour sessions (partners together)               |
| Facilitators                                      | 1 licensed therapist or clinical social worker                                                                   | (Peer) outreach workers                                                                                                                                    | 1 facilitator, preferably a mental health professional                                                            |
| Necessary facilitator skills                      | Cognitive Behavioral Theory<br>Cultural sensitivity<br>Experience/knowledge of population<br>HIV/AIDS knowledge  | Street knowledge<br>Access to target population<br>Able to enter sites visited by target population<br>Will not try to reform people<br>No personal agenda | Cultural competence, Modeling                                                                                     |
| Targeted participant skills                       | Increased self-efficacy<br>Sexual communication and negotiation<br>Condom use<br>Problem-solving<br>Goal-setting | Perceived STD/HIV risk                                                                                                                                     | Understanding of couple dynamics                                                                                  |
| Intervention exercises                            | Demonstration, Lecture<br>Games, Role play<br>Feeling Thermometer<br>Goal setting and practice                   | Role model story brochures<br>Discussion<br>Pamphlets, newsletters                                                                                         | Joining--establishing rapport                                                                                     |

**Table A** cont<sup>7</sup>

|                                                   | d-up: Defend Yourself! <sup>36, a</sup>                                                        | Healthy Relationships <sup>37, a</sup>                                                                                                                  | Partnership for Health <sup>38, a</sup>                                                                                               |
|---------------------------------------------------|------------------------------------------------------------------------------------------------|---------------------------------------------------------------------------------------------------------------------------------------------------------|---------------------------------------------------------------------------------------------------------------------------------------|
| Intervention level and original target population | Communities of black MSM who are in social networks with other black MSM                       | Groups of men, women, or MSM who are living with HIV                                                                                                    | Individual men, women, or MSM who are living with HIV                                                                                 |
| Effective in changing                             | Condomless sex, condom use, number of sex partners                                             | Condomless sex, sex frequency, condom negotiation                                                                                                       | Condomless sex<br>Medication adherence                                                                                                |
| Original setting                                  | Community venues                                                                               | Community center                                                                                                                                        | HIV/AIDS outpatient clinics                                                                                                           |
| Sessions                                          | Ongoing<br>Repeated brief encounters with friends                                              | Five, 2-hour sessions                                                                                                                                   | Ongoing<br>3-5 minutes during each medical care visit                                                                                 |
| Facilitators                                      | Peers who are respected opinion leaders in their friendship group                              | 1 mental health professional or skilled counselor and 1 peer                                                                                            | 1 health care provider                                                                                                                |
| Necessary facilitator skills                      | Respected<br>Credible<br>Trustworthy<br>Listened to<br>Empathetic to friends<br>Self-confident | Cultural competence<br>Communication<br>Modeling<br>Group facilitation<br>HIV/STD knowledge                                                             | Communication<br>Comfortable discussing sensitive topics<br>Framing messages<br>Reinforcing healthful behaviors<br>HIV/AIDS knowledge |
| Targeted participant skills                       | Perceived social norms<br>Perceived self-worth<br>Cope with racial and sexual biases           | Increased self-efficacy<br>Cope with stress<br>Recognize risk triggers<br>Sexual communication and negotiation<br>Decision-making<br>HIV/AIDS knowledge | Sexual communication and negotiation<br>Correct condom use<br>Decision-making                                                         |
| Intervention exercises                            | Discussion<br>Endorse safer sex norms<br>Promote personal self-worth                           | Personal Feedback forms<br>Risk continuum<br>Decisional balance grid<br>Skills videos and role play/discussion                                          | Discussion<br>Brochures and posters<br>Goal-setting<br>Referrals <sup>+</sup>                                                         |

**Table A** cont.’

|                                                   | RESPECT <sup>39</sup>                                                                           | Safety Counts <sup>40</sup>                                                                                 | Sister to Sister <sup>41, a</sup>                                                                                                                                                        |
|---------------------------------------------------|-------------------------------------------------------------------------------------------------|-------------------------------------------------------------------------------------------------------------|------------------------------------------------------------------------------------------------------------------------------------------------------------------------------------------|
| Intervention level and original target population | Individual heterosexuals attending STD clinics                                                  | Groups of substance users and IDUs not in treatment                                                         | Individual African American women attending family planning and other reproductive health clinics                                                                                        |
| Effective in changing                             | Condom use, repeat STDs                                                                         | Drug injecting, crack use, condom use                                                                       | Condom use, condomless sex, repeat STDs                                                                                                                                                  |
| Original setting                                  | STD clinics                                                                                     | Recreation center                                                                                           | Women’s outpatient clinic in a large hospital                                                                                                                                            |
| Sessions                                          | Two, 20-minute sessions (one after sample is taken, one after HIV test results are given)       | Two group and one individual sessions, two social events, two follow-up contacts over 4 months              | One, 20-30 minute session                                                                                                                                                                |
| Facilitators                                      | 1 trained HIV test counselor                                                                    | 1 counselor and 1 outreach worker                                                                           | 1 female African American health care staff person                                                                                                                                       |
| Necessary facilitator skills                      | HIV counseling, testing, and referral<br>Client-focused counseling<br>HIV/AIDS knowledge        | Familiarity with drug-using culture<br>Communication<br>Modeling<br>Group facilitation<br>HIV-STD knowledge | Knowledge of the population<br>Communication<br>Counseling, Listening<br>Comfortable teaching sexuality issues<br>HIV/AIDS knowledge                                                     |
| Targeted participant skills                       | Perceived STD/HIV risk<br>Recognizing risk triggers<br>Enhancing social support<br>Goal-setting | Identifying social support<br>Knowledge of HIV risk related to drug use                                     | Perceived STD/HIV risk<br>Increased self-efficacy and self-worth<br>Correct condom use<br>Decision-making<br>Sexual communication and negotiation<br>HIV/AIDS knowledge<br>STD knowledge |
| Intervention exercises                            | HIV test<br>Discussion<br>Goal-setting<br>Referrals                                             | Video-taped success stories<br>Discussions, Brochures<br>Goal-setting<br>Social events                      | Demonstration, Modeling<br>Lecture<br>Videos, Posters<br>Role play and practice                                                                                                          |

**Table A** cont.’

|                                                   | START <sup>42, a</sup>                                                                     | Street Smart <sup>43</sup>                                                                                                                                                         | WILLOW <sup>44, a</sup>                                                                                                                                                                        |
|---------------------------------------------------|--------------------------------------------------------------------------------------------|------------------------------------------------------------------------------------------------------------------------------------------------------------------------------------|------------------------------------------------------------------------------------------------------------------------------------------------------------------------------------------------|
| Intervention level and original target population | Individual young men (aged 18-29) being released from prison                               | Groups of homeless or runaway youth                                                                                                                                                | Groups of women (aged 18-50) living with HIV                                                                                                                                                   |
| Effective in changing                             | Condomless sex                                                                             | Condomless sex, non-injection substance use                                                                                                                                        | Condomless sex, condom use, repeat STDs                                                                                                                                                        |
| Original setting                                  | State prisons                                                                              | Shelter for runaway youth                                                                                                                                                          | Community sites and HIV service clinic                                                                                                                                                         |
| Sessions                                          | Three sessions within 60 days before release, four sessions during 3 months after release  | Eight 90-minute group sessions, Two 60-minute individual sessions                                                                                                                  | Four, 4-hour sessions                                                                                                                                                                          |
| Facilitators                                      | 1 counselor                                                                                | 1 counselor                                                                                                                                                                        | 1 female health educator and 1 peer                                                                                                                                                            |
| Necessary facilitator skills                      | Experience/knowledge of population<br>HIV/AIDS knowledge<br>STD and hepatitis knowledge    | Motivational skills<br>Modeling<br>Working with sexually abused youth<br>Mental health counseling<br>Substance abuse counseling                                                    | Experience/knowledge of population<br>Communication<br>Group facilitation<br>Empathy/compassion<br>HIV/AIDS knowledge<br>STD knowledge                                                         |
| Targeted participant skills                       | Prioritizing needs<br>Problem-solving<br>Decision-making<br>Goal-setting<br>Risk reduction | Self-efficacy<br>Cope with stigma/discrimination<br>Recognize risk triggers<br>Valuing intrinsic rewards<br>Critical thinking/problem solving<br>Social skills, HIV/AIDS knowledge | Sexual communication and negotiation<br>Gender pride<br>Correct condom use, Cope with stress<br>Decision-making, Goal-setting<br>Recognize unhealthy relationships<br>Enhancing social support |
| Intervention exercises                            | Needs assessment<br>Discussion<br>Goal-setting<br>Referrals                                | Role plays (scripted and unscripted with optional videotaping)<br>Feeling Thermometer<br>Tokens to express appreciation                                                            | Discussion<br>Demonstration<br>Lecture<br>Role play and practice                                                                                                                               |

*Note:* IDU = injection drug user. MSM = men who have sex with men. STD = sexually transmitted disease.

<sup>a</sup>EBIs with training and capacity building assistance available through the Effective Interventions Web site (<https://effectiveinterventions.cdc.gov/>). The other EBIs have training and technical assistance available through other sources listed on the Web site.
